# Supplementary material
Source: MDPI journal article supplement (https://www.mdpi.com/2313-4321/7/4/52)
Supplement: s1 [file s1]

# Factors Influencing Household Waste Separation Behavior: Cases of Russia and Finland

## Supplementary materials

**Anna Zaikova <sup>1,\*</sup>, Ivan Deviatkin <sup>1</sup>, Jouni Havukainen <sup>1</sup>, Mika Horttanainen <sup>1</sup>, Thomas Fruergaard Astrup <sup>2</sup>,  
Minna Saunila <sup>3</sup> and Ari Happonen <sup>4</sup>**

<sup>1</sup> Department of Sustainability Science, Lappeenranta-Lahti University of Technology LUT, Yliopistonkatu 34, 53851 Lappeenranta, Finland; ivan.deviatkin@outlook.com (I.D.); jouni.havukainen@lut.fi (J.H.); mika.horttanainen@lut.fi (M.H.)

<sup>2</sup> Department of Environmental and Resource Engineering, Technical University of Denmark, Bygningstorvet 115, 2800 Lyngby, Denmark; thas@env.dtu.dk

<sup>3</sup> Department of Industrial Engineering and Management, Lappeenranta-Lahti University of Technology LUT, Mikkulankatu 19, 15210 Lahti, Finland; minna.saunila@lut.fi

<sup>4</sup> Department of Software Engineering, Lappeenranta-Lahti University of Technology LUT, Yliopistonkatu 34, 53851 Lappeenranta, Finland; ari.happonen@lut.fi

\* Correspondence: anna.zaikova@lut.fi

**Table S1. Items and latent factors measured.**

| Factor                                                                              | Code  | Item                                                                                          |
|-------------------------------------------------------------------------------------|-------|-----------------------------------------------------------------------------------------------|
| <b>Waste source-separation behavior (BEH)</b>                                       |       |                                                                                               |
| Q: How often do you currently collect waste separately?                             |       |                                                                                               |
| Scale: (1) Never – (5) Always                                                       |       |                                                                                               |
|                                                                                     | BEH1  | Currently I separate recyclable waste from my mixed waste (e.g., glass, paper, plastic, etc.) |
|                                                                                     | BEH 2 | Currently I separate hazardous waste from my mixed waste (e.g., batteries, lamps, etc.)       |
| <b>Waste source-separation intentions (INT)</b>                                     |       |                                                                                               |
| Q: Would you participate in separate waste collection in the future?                |       |                                                                                               |
| Scale: (1) No – (5) Yes                                                             |       |                                                                                               |
|                                                                                     | INT1  | I would follow the guidelines introduced for sorting waste in the future                      |
|                                                                                     | INT2  | I would like to sort my waste in the future                                                   |
| <b>Attitude to waste separation (ATT)</b>                                           |       |                                                                                               |
| Q: Rate how you agree with the following statements                                 |       |                                                                                               |
| Scale: (1) I disagree – (5) I agree                                                 |       |                                                                                               |
|                                                                                     | ATT1  | Recycling of waste saves resources and makes environment cleaner                              |
|                                                                                     | ATT2  | Waste separation is useful for preserving our environment and resources                       |
|                                                                                     | ATT3  | Waste separation can make environment we live in better                                       |
|                                                                                     | ATT4  | We do not have a need in waste recycling                                                      |
| <b>Perceived behavioral control (PBC)</b>                                           |       |                                                                                               |
| Q: Rate how you agree with the following statements                                 |       |                                                                                               |
| Scale: (1) I disagree – (5) I agree                                                 |       |                                                                                               |
|                                                                                     | PBC1  | The decision to sort my waste is entirely up to me                                            |
|                                                                                     | PBC2  | I decide by myself whether to sort the waste                                                  |
| <b>Subjective norms (SN)</b>                                                        |       |                                                                                               |
| Q: Rate how you agree with the following statements                                 |       |                                                                                               |
| Scale: (1) I disagree – (5) I agree                                                 |       |                                                                                               |
|                                                                                     | SN1   | I think my closest ones expect me to separate waste                                           |
|                                                                                     | SN2   | I think my neighbors expect me to separate waste                                              |
|                                                                                     | SN3   | I think the community as a whole expects me to separate waste                                 |
| <b>Inconvenience of waste collection system (SYST)</b>                              |       |                                                                                               |
| Q: How much can the following factors prevent you from collecting waste separately? |       |                                                                                               |
| Scale: (1) Not at all – (5) Very much                                               |       |                                                                                               |
|                                                                                     | SYST1 | Lack of a ubiquitous waste collection system in the city                                      |
|                                                                                     | SYST2 | Lack of convenient waste collection system                                                    |
|                                                                                     | SYST3 | Separate waste containers are located too far away                                            |
|                                                                                     | SYST4 | Limited space in the house for collecting waste                                               |
|                                                                                     | SYST5 | The need to spend time on waste sorting                                                       |
| <b>Availability of information (INF)</b>                                            |       |                                                                                               |
| Q: Do you have information on the following aspects?                                |       |                                                                                               |
| Scale: (1) No – (5) Yes                                                             |       |                                                                                               |

- INF1 Possibilities to collect waste separately in your area
- INF 2 Where you can bring the separately collected waste
- INF 3 How to sort waste
- INF 4 Where to find information about separate collection of waste

**Economic incentives to waste separation (ECON)**

Q: How important are the following factors to you when sorting waste?

Scale: (1) Not at all important – (5) Very important

- ECON1 Monetary benefit in waste sorting
- ECON 2 Reduced waste collection fees when I sort the waste
- ECON 3 Refund of the cost of packaging (for example, plastic bottles) if I recycle it

**Distrust of waste collection system (DISTR)**

Q: Rate how you agree with the following statements

Scale: (1) I disagree – (5) I agree

- DISTR1 I am not sure whether separately collected waste is treated accordingly
- I suspect sorted waste often does not get recycled and is landfilled
- DISTR2 anyway
- I want to be more confident that the separately collected waste will be
- DISTR3 recycled
